# Supplementary material for: Efficacy of Different Dietary Patterns in the Treatment of Functional Gastrointestinal Disorders in Children and Adolescents. A Systematic Review of Intervention Studies
Source: Preprints.org preprint supplement (doi:10.20944/preprints202305.0508.v1), 2023-05-08
Supplement: Supplementary file 1 [file supplementary]

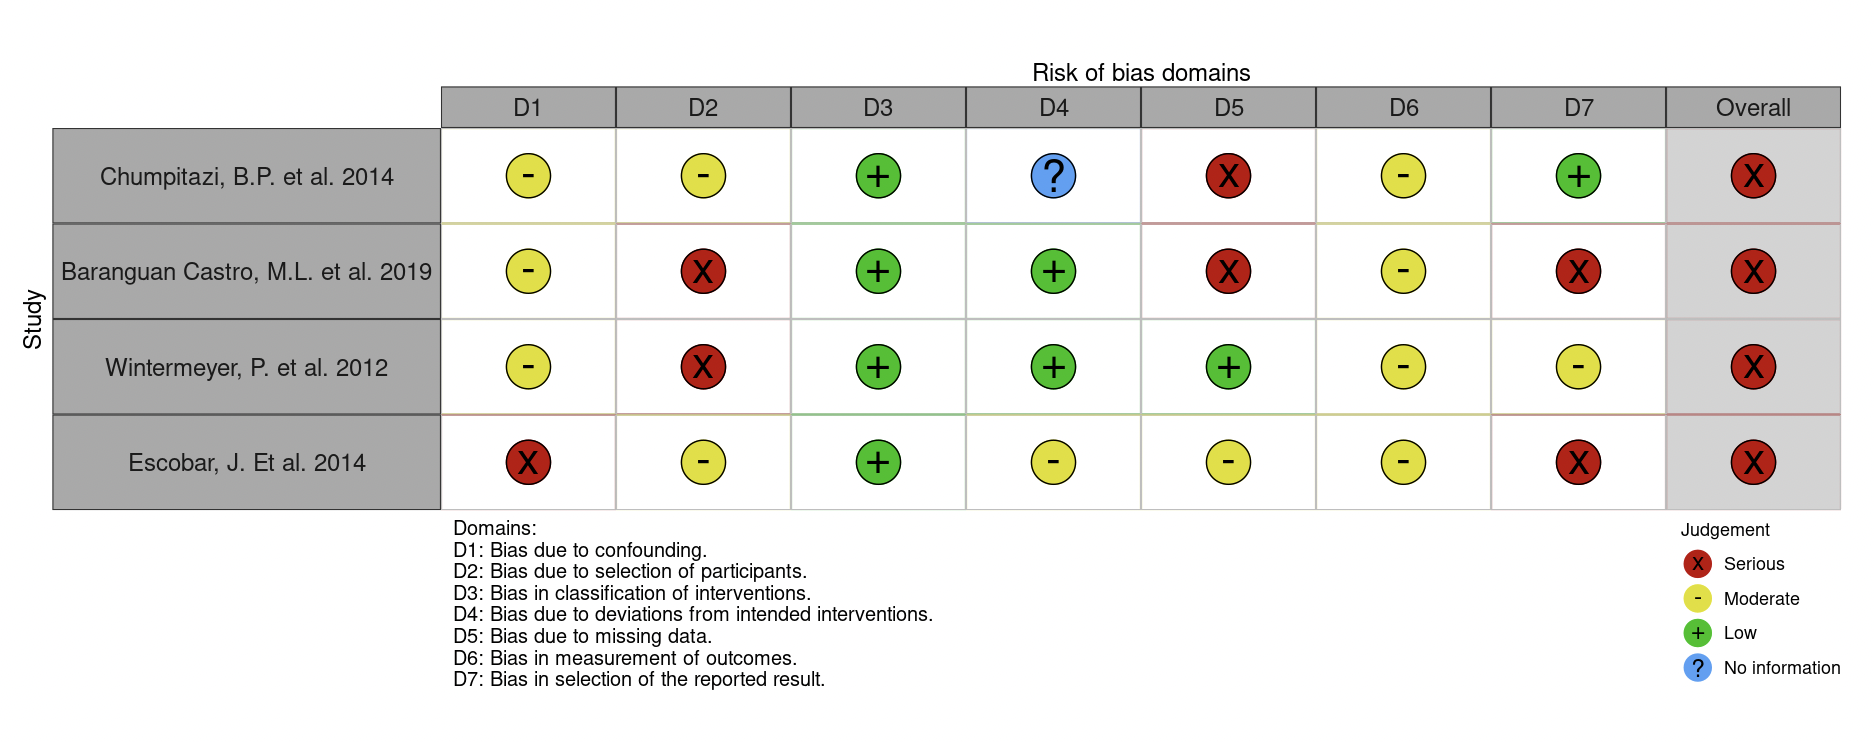


**Figure S1.** Risk of bias of the eligible non-RCTs/single arm clinical trials using the Risk Of Bias In Non-randomized Studies - of Interventions (ROBINS-I) [19] [1] tool.


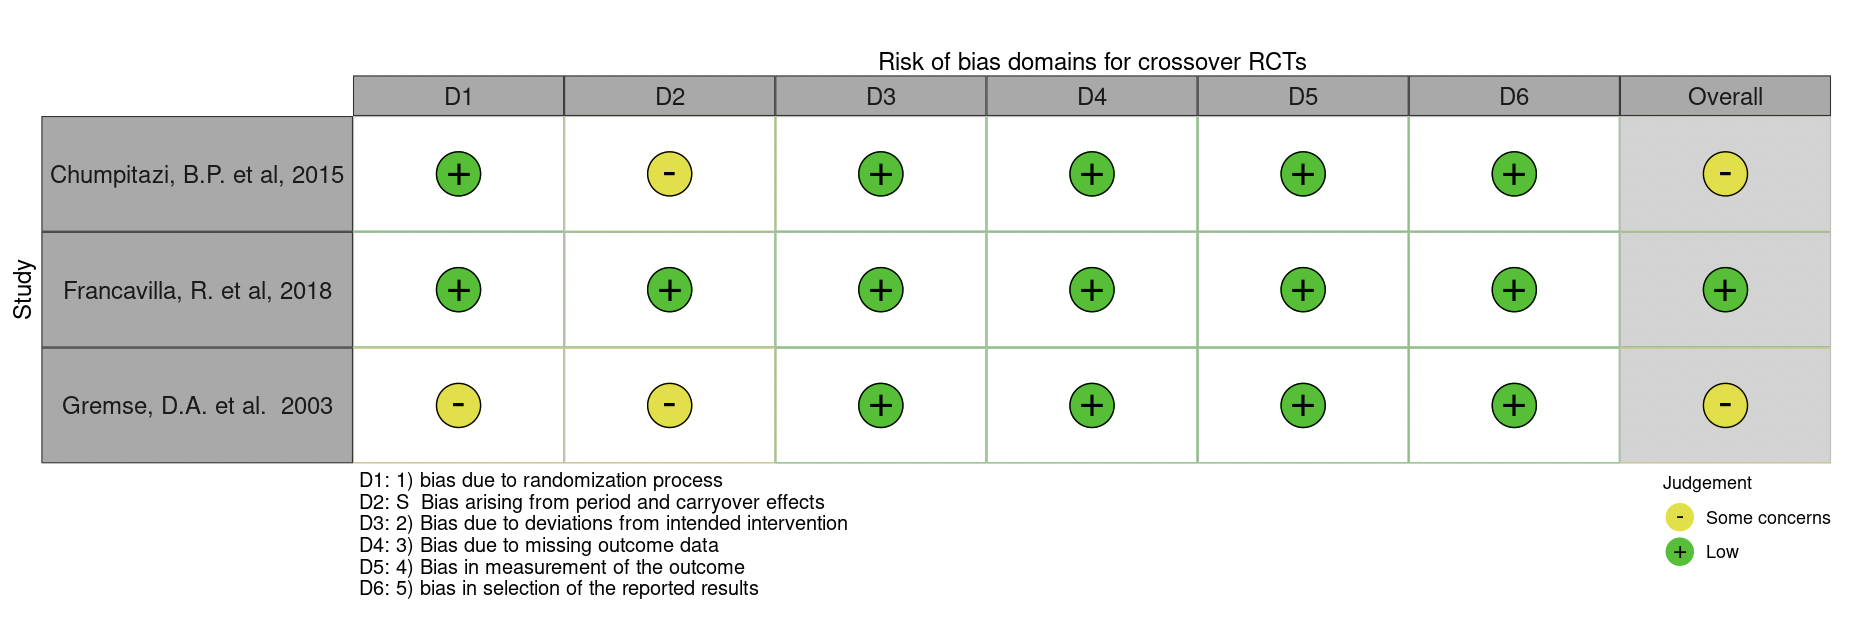


**Figure S2.** Risk of bias of the eligible RCTs with crossover design using the Cochrane Risk of Bias Tool (ROB-2) [22] tool for crossover trials.


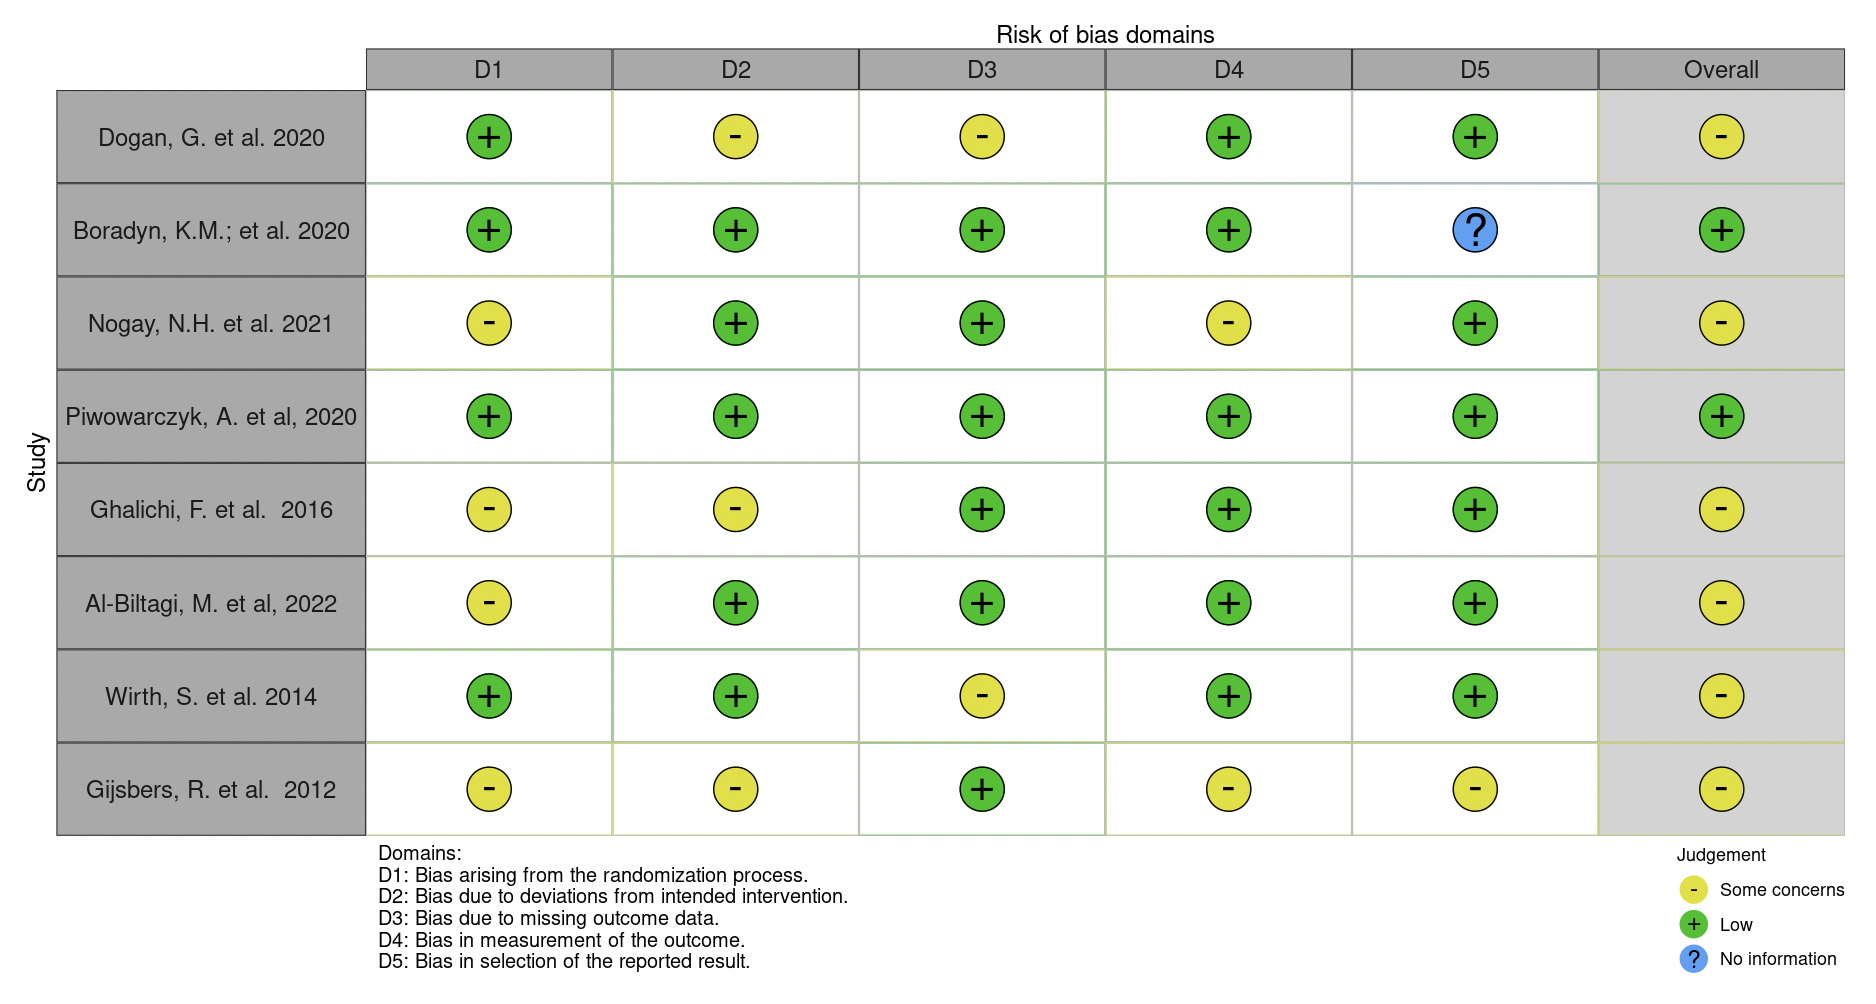


**Figure S3.** Risk of bias of the eligible RCTs using the Cochrane Risk of Bias Tool (ROB-2) [21].

**References:**

19. Sterne, J.A.; Hernán, M.A.; Reeves, B.C.; Savović, J.; Berkman, N.D.; Viswanathan, M.; Henry, D.; Altman, D.G.; Ansari, M.T.; Boutron, I. ROBINS-I: a tool for assessing risk of bias in non-randomised studies of interventions. bmj 2016, 355.

21. Higgins, J.P.; Li, T.; Sterne, J. Revised Cochrane risk of bias tool for randomized trials (RoB 2): Additional considerations for crossover trials. Cochrane Methods 2021, 1-6.

22. Sterne, J.A.; Savović, J.; Page, M.J.; Elbers, R.G.; Blencowe, N.S.; Boutron, I.; Cates, C.J.; Cheng, H.-Y.; Corbett, M.S.; Eldridge, S.M. RoB 2: a revised tool for assessing risk of bias in randomised trials. bmj 2019, 366.
